# Supplementary material
Source: HighWire-hosted journal article supplement (https://jnm.snmjournals.org/highwire/filestream/94011/field_highwire_adjunct_files/1/Supplemental_Video_1_legendpdf.pdf)
Supplement: Supplemental_Video_1_legendpdf.pdf [file Supplemental_Video_1_legendpdf.pdf]

**SUPPLEMENTAL VIDEO 1.** Rapid lung uptake of the tracer is seen within the first lung transit time (first few seconds) and is maintained up to 30 minutes in the control rat (left). We barely see any active lung uptake in the PAH animal (right).
